# Supplementary material for: A superhydrophobic and porous polymer adsorbent with large surface area
Source: Royal Society of Chemistry journal article supplement (doi:10.1039/d0ta07944h), 2020-11-23
Supplement: d0ta07944h1.pdf [file d0ta07944h1.pdf]

1                                   **Electronic Supplementary Information**

2                   A Superhydrophobic and Porous Polymer Adsorbent with Large

3                                   Surface Area

4                                   Li Gong<sup>a,b,c</sup>, Wenhao Wu<sup>a,b,c</sup>, Daohui Lin<sup>a,b,c</sup>, Kun Yang<sup>a,b,c,d\*</sup>

5   <sup>a</sup>Department of Environmental Science, Zhejiang University, Hangzhou 310058, China;

6   <sup>b</sup>Key Laboratory of Environmental Pollution and Ecological Health of Ministry of Education,

7   Hangzhou 310058, China;

8   <sup>c</sup>Zhejiang Provincial Key Laboratory of Organic Pollution Process and Control, Hangzhou

9   310058, China;

10   <sup>d</sup>Zhejiang University-Hangzhou Global Scientific and Technological Innovation Center,

11   Hangzhou 311200, China;

12   \*Corresponding author (Kun Yang). Tel.: 86-571-88982589; Fax: 86-571-88982590;

13   E-mail: [kyang@zju.edu.cn](mailto:kyang@zju.edu.cn)

## 15 1. Experimental Section

### 16 1.1 Synthesis of SHMP-1

17 0.3 mmol (0.14 g) 2-[3,5-di-(naphthalen-2-yl)-phenyl]-naphthalene (TNP, > 98 %,  
18 Extension Technology Co.) and 20 mL dichloromethane (DCM, > 99.9 %, Aladdin) were  
19 added into a 50 mL schlenk flask in N<sub>2</sub> atmosphere, stirring for 10 min until TNP was  
20 completely dissolved. Then, 14.4 mmol (1.92 g) anhydrous aluminum chloride (AlCl<sub>3</sub>, > 99  
21 %, Aladdin) was added, and heated to 40 °C for 24 h, followed by 80 °C for 24 h. The product  
22 was quenched with 100 mL dilute hydrochloric acid (V<sub>HCl</sub>/V<sub>H2O</sub>=2:1), washed three times  
23 with water and twice with ethanol. The product was finally dried in a vacuum oven for 24 h at  
24 80 °C to get the brown powder of 0.172 g, i. e., the yield is 123 %, calculated from the mass  
25 of added monomers by the following equation S1.

$$26 \quad \text{Yield} = \frac{M_1}{M_0} \times 100 \% \quad (\text{S1})$$

27  $M_1$  is the mass of the synthesized polymer (mg),  $M_0$  is the mass of added monomers (mg).

### 28 1.2 Chemical stability tests of SHMP-1

29 30 mg of SHMP-1 was added in 30 mL HCl (5 mol/L) solution into a 40 mL bottle with  
30 the cap sealed. After 2 days, the HCl treated SHMP-1 was separated by filtration, washed  
31 with water three times and ethanol twice, then dried in vacuum oven at 80 °C for 24 h. The  
32 treatments of SHMP-1 by 5 mol/L NaOH solution and organic solvents (i.e., acetone, carbon  
33 tetrachloride, tetrahydrofuran and n-hexane) were the same with that of HCl solution.

### 34 1.3 Characterization of SHMP-1 and chemical treated SHMP-1

35 Contact angles of water and oil were measured by a contact angle meter (Dataphysics  
36 OCA20). 10 mg polymer was dispersed in 5 mL methanol, and then, dropped and coated on  
37 the double-sided adhesive (which has been pasted on a slide) in a spin coater at 1000 rpm/min  
38 for 10 min to get a macroscopically smooth surface for contact angle measurement. The  
39 volume of droplets of water or oil for contact angle measurement was 5  $\mu$ L. Contact angle  
40 measurement was repeated 5 times to get an average value for polymer.

41 Adsorption-desorption isotherms of N<sub>2</sub> at 77 K and CO<sub>2</sub> at 273 K or 298 K on SHMP-1 were  
42 conducted on a AUTOSORB AS-1 physisorption analyzer (Quantachrome). SHMP-1 was  
43 outgassed overnight at 105 °C before N<sub>2</sub> and CO<sub>2</sub> adsorption experiment. Specific surface  
44 area of SHMP-1 was calculated from N<sub>2</sub> adsorption isotherm using the Brunauer-Emmett-  
45 Teller (BET) method in the relative pressure ( $P/P_0$ ) range of 0.005–0.1. This range was  
46 obtained from Rouquerol plot of N<sub>2</sub> isotherm and is a linear region for the BET equation  
47 (Figure S9). Total pore volume and micropore volume were get from N<sub>2</sub> adsorption at  $P/P_0$   
48 =0.99 and  $P/P_0$  =0.18, respectively. Pore size distribution (PSD) was calculated by the  
49 Nonlocal Density Functional Theory (NLDFT) method from the N<sub>2</sub> adsorption isotherm used  
50 the NLDFT equilibrium model of N<sub>2</sub> at 77 K on carbon with slit pores and Grand Canonical  
51 Monte Carlo (GCMC) method from the CO<sub>2</sub> adsorption isotherm measured at 273 K. Fourier  
52 transform infrared (FTIR) spectra of SHMP-1 and TNP were recorded in the range from 4000  
53 to 500 cm<sup>-1</sup> (Bruker-vector-22). SHMP-1 and TNP were mixed with KBr, ground in agate  
54 mortar, and then pressed to a tablet for FTIR measurement. Solid-state <sup>13</sup>C cross-polarization

55 magic-angle spinning nuclear magnetic resonance ( $^{13}\text{C}$  CP/MAS NMR) spectrum of SHMP-1  
56 was recorded on a 400 MHz Bruker Avance III HD at a spinning frequency of 9 kHz (contact  
57 time of 3 ms and pulse delay for 5 s) using a 4 mm double channel MAS probe.  
58 Thermogravimetric analysis (TGA) of SHMP-1 was carried out on a PerkinElmer Instrument  
59 Pyris1 TGA in the range of 50-850 °C at the heating rate of 10 °C/min in oxygen atmosphere.  
60 Field emission scanning electron microscopy (FE-SEM) images and energy dispersive  
61 spectroscopy (EDS) mapping of SHMP-1 were collected by a Zeiss GEMINI 300 with the  
62 scanning voltage of 1 kV. For SEM observation, 2 mg polymer powders were dispersed in 10  
63 mL n-hexane by 30 min ultra-sonication, and then, dropped on a silicon wafer to form a film  
64 after evaporation of n-hexane. Powder X-ray diffraction (XRD) pattern of SHMP-1 was  
65 recorded on an D/max-2550 X-ray diffractometer (Rigaku) from 3° to 77° with a scan step  
66 size of 0.02° at 40 kV using Cu/K $\alpha$  radiation. 100 mg of polymer powder was used to test  
67 particle sizes by the bluewave s3500 laser particle size meter (Microtrac).

#### 68 **1.4 Adsorption-desorption experiment of water vapor**

69 Adsorption-desorption of water vapor on SHMP-1 was determined at the relative  
70 humidity in the range of 0% to 90% at 25 °C by the AQUADYNE DVS water vapor  
71 adsorption instrument (Quantachrome) with a quartz balance. Adsorption equilibrium was  
72 assumed to be reached when the weight change of sample was less than 0.1  $\mu\text{g}$  within 10  
73 min at a given relative humidity. Before adsorption, SHMP-1 was outgassed in vacuum at  
74 105 °C overnight.

#### 75 **1.5 Absorption experiment of organic solvents**

76 Organic solvents absorption were carried out at 25 °C in both of the syringes and the  
77 vials according to the procedures reported by Kim et al. (*Chem. Mater.*, **2019**, 31, 5206) and  
78 Li et al. (*Energy Environ. Sci.*, **2011**, 4, 2062), respectively. After outgassed in a vacuum at  
79 105 °C overnight, 100 mg SHMP-1 was filled into a 10 mL syringe with tip blocked by 10  
80 mg fiberglass. Then, organic solvents were dropped into the tip blocked syringes with or  
81 without filled SHMP-1 until the solvent flowed out from the tip. After 2 min without solvent  
82 flowed out from the tips, both of the syringes with or without filled SHMP-1 were weighted  
83 to get the absorbed mass of organic solvents. For vial experiment, 100 mg outgassed SHMP-  
84 1 and 3mL organic solvents were mixed in 8 mL vials for 5 min. Then, SHMP-1 were  
85 separated by centrifugation at 3500 r/min for 15 min, and weighted to get the absorbed mass.

#### 86 **1.6 Breakthrough experiments of CO<sub>2</sub> with or without water vapor**

87 Breakthrough experiments of CO<sub>2</sub> with or without water vapor were conducted at 298 K  
88 and 1 bar by setting up an instrument following the schematic diagram shown in Figure S10.  
89 SHMP-1 (1.1356 g) was placed in the column fixed bed (10 mm in diameter and 7 cm in  
90 length), activated at 378 K under vacuum for 24 h, and purged using He gas for 1h at 1.0 bar  
91 before breakthrough experiment. Then, adsorption of CO<sub>2</sub> was performed with or without  
92 water vapor at a total feed flow rate of 10 mL/min. Water vapor was introduced by the CO<sub>2</sub>  
93 gas passing through a temperature-controlled humidifier. Relative humidity (RH) was  
94 controlled by mixing the gas flow of CO<sub>2</sub> passed from temperature-controlled humidifier and  
95 another gas flow of dry CO<sub>2</sub>. The adsorption capacity of CO<sub>2</sub> was calculated using the  
96 following equation S2 from the breakthrough curves.

97 
$$Q_{adsorption} = V_{input}C_{n0}\Delta t - \int_0^t V_{influent}C_{nt}dt \quad (S2)$$

98 Where  $Q_{adsorption}$  is the adsorption capacity of CO<sub>2</sub> (cm<sup>3</sup>) at time  $t$ ,  $V_{input}$  and  $V_{influent}$  is the  
99 input and effluent flow rate (cm<sup>3</sup>/min) respectively,  $C_{n0}$  and  $C_{nt}$  is the input and effluent CO<sub>2</sub>  
100 concentration (mg/m<sup>3</sup>) respectively, and  $\Delta t$  is the breakthrough time (min).

### 101 **1.7 Structure simulation of SHMP-1**

102 Structure of SHMP-1 was simulated by Accelrys' Material Studio (MS) v.8.0 software.  
103 The particular model was constructed from a combination of clusters containing 147 carbon  
104 atoms. Each cluster was relaxed fully using the Discover module and the COMPASS force-  
105 field twice to ensure the cell parameters as well as the density remained constant. Then, a  
106 Connolly surface was established to model the structure using Atom, Volumes and Surface  
107 tool and employing a fine grid resolution (0.25 Å) and a Connolly kinetic radius for N<sub>2</sub> of  
108 1.82 Å. The interconnected micropore structure was simulated by packing amorphous cells  
109 with periodic boundary conditions. Pore widths were estimated from two-dimensional slices  
110 of the simulated pore structure. This model simulates the microporosity only but not the  
111 mesoporosity and the macroporosity.

112 **Table S1. Summary of superhydrophobic materials with their water contact angles**  
 113 **(WCA), specific surface area ( $S_{\text{BET}}$ ) and pore volume values.**

| Samples                      | WCA( $^{\circ}$ ) | $S_{\text{BET}}$<br>( $\text{m}^2/\text{g}$ ) | Pore<br>volume ( $\text{cm}^3/\text{g}$ ) | References                                                 |
|------------------------------|-------------------|-----------------------------------------------|-------------------------------------------|------------------------------------------------------------|
| SHMP-1                       | 167               | 2100                                          | 1.20                                      | This work                                                  |
| OPA-PCN-222                  | 157               | 1617                                          | -                                         | <i>J. Mater. Chem. A</i> <b>2017</b> , 3, 16213            |
| OPA-UiO-66-SO <sub>3</sub> H | 162               | 1148                                          | -                                         | <i>J. Mater. Chem. A</i> <b>2017</b> , 3, 16213            |
| COF-DTF                      | >150 $^{\circ}$   | 1056                                          | 1.75                                      | <i>ACS Appl. Mater. Inter.</i> <b>2019</b> , 12, 2926      |
| COF-VF                       | 167 $^{\circ}$    | 938                                           | -                                         | <i>Chem</i> <b>2018</b> , 4, 1726                          |
| PANI                         | 165               | 835.7                                         | -                                         | <i>J. Mater. Chem. A</i> <b>2015</b> , 3, 19299            |
| ZCMP-1                       | 153.9             | 691                                           | 0.416                                     | <i>J. Mater. Chem. A</i> <b>2018</b> , 6, 8633             |
| PG                           | 160               | 653                                           | 0.226                                     | <i>Adv. Mater.</i> <b>2017</b> , 29, 1605307               |
| Sponge@HFGO@ZIF-8            | 162               | 590                                           | -                                         | <i>Angew. Chem. Int. Edit.</i> <b>2016</b> , 55, ,<br>1178 |
| IISERP-COF <sub>2</sub>      | 161               | 584                                           | -                                         | <i>J. Mater. Chem. A</i> <b>2017</b> , 5, 8376             |
| PTSA to cotton               | 157               | 477                                           | 0.60                                      | <i>J. Mater. Chem. A</i> <b>2015</b> , 3, 16213            |
| PVA-3                        | 156.6             | 425.3                                         | -                                         | <i>Adv. Funct. Mater.</i> <b>2017</b> , 27, 1604423        |
| CNP                          | 163               | 366                                           | -                                         | <i>J. Am. Chem. Soc.</i> <b>2018</b> , 140, 13786          |
| HMDS/ZSAs                    | 154               | 174.4                                         | 0.725                                     | <i>J. Mater. Chem. A</i> <b>2016</b> , 4, 5632             |
| RGO/PC                       | 161               | 137.2                                         | -                                         | <i>Carbon</i> <b>2011</b> , 49, 5166                       |
| PVDF/graphene                | 153               | 131.3                                         | -                                         | <i>J. Mater. Chem. A</i> <b>2014</b> , 2, 3057             |
| GA                           | 153.9             | 117                                           | 0.991                                     | <i>J. Mater. Chem. A</i> <b>2015</b> , 3, 7498             |

**Table S2. Absorption capacity of organic solvents by superhydrophobic materials.**

| Materials  | S <sub>BET</sub><br>(m <sup>2</sup> /g) | Organic solvents   | Absorption capacity |                       |                     | References                                            |
|------------|-----------------------------------------|--------------------|---------------------|-----------------------|---------------------|-------------------------------------------------------|
|            |                                         |                    | (g/g) <sup>a</sup>  | (mmol/g) <sup>b</sup> | (mL/g) <sup>b</sup> |                                                       |
| SHMP-1     | 2100                                    | 1,2-dichlorbenzene | 25.00               | 170                   | 19.48               | This study                                            |
|            |                                         | Nitrobenzene       | 18.20               | 148                   | 15.04               |                                                       |
|            |                                         | Benzene            | 11.80               | 151                   | 13.41               |                                                       |
|            |                                         | DMSO               | 10.22               | 128                   | 9.18                |                                                       |
|            |                                         | DMF                | 8.91                | 122                   | 9.48                |                                                       |
|            |                                         | Methanol           | 4.09                | 128                   | 5.19                |                                                       |
| OPA-UiO-66 | 1068                                    | Toluene            | 3.50                | <i>38</i>             | <i>4.02</i>         | <i>J. Mater. Chem. A</i><br><b>2017</b> , 5,18770     |
|            |                                         | DMF                | 3.52                | <i>48</i>             | <i>3.74</i>         |                                                       |
|            |                                         | Chloroform         | 2.02                | <i>17</i>             | <i>1.36</i>         |                                                       |
|            |                                         | Acetone            | 1.48                | <i>26</i>             | <i>1.87</i>         |                                                       |
|            |                                         | Methanol           | 1.60                | <i>34</i>             | <i>2.02</i>         |                                                       |
| HCMP-2     | 928                                     | 1,2-dichlorbenzene | 24.03               | <i>163</i>            | <i>18.46</i>        | <i>Energy Environ. Sci.</i><br><b>2011</b> , 4, 2062  |
|            |                                         | Benzene            | 10.64               | <i>83</i>             | <i>7.39</i>         |                                                       |
|            |                                         | DMSO               | 6.08                | <i>78</i>             | <i>12.27</i>        |                                                       |
|            |                                         | Nitrobenzene       | 16.20               | <i>130</i>            | <i>13.22</i>        |                                                       |
|            |                                         | Methanol           | 4.74                | <i>148</i>            | <i>8.86</i>         |                                                       |
|            |                                         | Ethanol            | 6.02                | <i>131</i>            | <i>7.59</i>         |                                                       |
|            |                                         | Acetone            | 6.03                | <i>104</i>            | <i>7.65</i>         |                                                       |
|            |                                         | THF                | 11.3                | <i>152</i>            | <i>12.54</i>        |                                                       |
|            |                                         | Ethylbenzene       | 11.5                | <i>108</i>            | <i>13.21</i>        |                                                       |
|            |                                         | Chloroform         | 13.5                | <i>113</i>            | <i>9.12</i>         |                                                       |
|            |                                         | Phenol             | 9.9                 | <i>107</i>            | <i>9.34</i>         |                                                       |
|            |                                         | Hexane             | 5.8                 | <i>67</i>             | <i>8.78</i>         |                                                       |
| COP-177    | 536                                     | DMF                | 8.89                | 115                   | 8.88                | <i>Chem. Mater.</i> <b>2019</b> ,<br>31, 5206         |
|            |                                         | THF                | 6.10                | 88                    | 7.10                |                                                       |
|            |                                         | Methanol           | 2.94                | 136                   | 5.52                |                                                       |
|            |                                         | Toluene            | 6.41                | 66.6                  | 7.08                |                                                       |
|            |                                         | Chloroform         | 11.23               | 94                    | 7.54                |                                                       |
| HFGO@ZIF-8 | 590                                     | DMSO               | 7.49                | <i>96</i>             | <i>6.81</i>         | <i>Angew. Chem. Int. Edit.</i> <b>2016</b> , 55, 1178 |
|            |                                         | DMF                | 0.950               | <i>13</i>             | <i>13.83</i>        |                                                       |
|            |                                         | Veg oil            | 2.01                | /                     | /                   |                                                       |
|            |                                         | Coconut oil        | 2.23                | /                     | /                   |                                                       |
|            |                                         | Petroleum ether    | 1.90                | /                     | /                   |                                                       |
| PP/mnPTFE  | /                                       | DMSO               | 7.49                | <i>96</i>             | <i>6.81</i>         | <i>ACS Appl. Mater. Inter.</i> <b>2019</b> , 11, 7479 |
|            |                                         | Benzene            | 6.94                | <i>89</i>             | <i>7.89</i>         |                                                       |
|            |                                         | Chloroform         | 8.30                | <i>70</i>             | <i>5.61</i>         |                                                       |
|            |                                         | Dichloroethane     | 9.10                | <i>96</i>             | <i>7.37</i>         |                                                       |
|            |                                         | Olive oil          | 5.98                | /                     | /                   |                                                       |

116 <sup>a</sup> reported in the literatures, <sup>b</sup> reported data or calculated data (italic) from the mass adsorption capacity with molecular weight  
117 or density. /: not available.



118 **Table S3. The weight recovered and percent recovery of SHMP-1 (30 mg) after 2 day**  
119 **immersion in 5M HCl and 5M NaOH solution or organic solvents.**

| <b>solvents</b>      | <b>recovered weight (mg)</b> | <b>recovery rate (%)</b> |
|----------------------|------------------------------|--------------------------|
| HCl                  | 29.7                         | 99.0                     |
| NaOH                 | 29.6                         | 98.7                     |
| Ethanol              | 29.6                         | 98.7                     |
| Acetone              | 29.5                         | 98.3                     |
| Carbon tetrachloride | 29.5                         | 98.3                     |
| Tetrahydrofuran      | 29.6                         | 98.7                     |
| n-Hexane             | 29.7                         | 99.0                     |

121

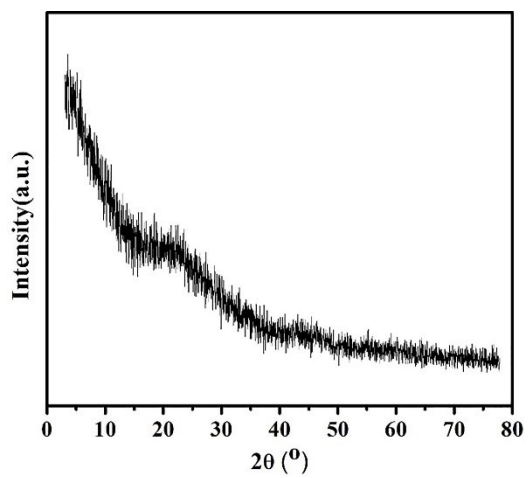

122

123

Figure S1. Powder XRD pattern of SHMP-1.

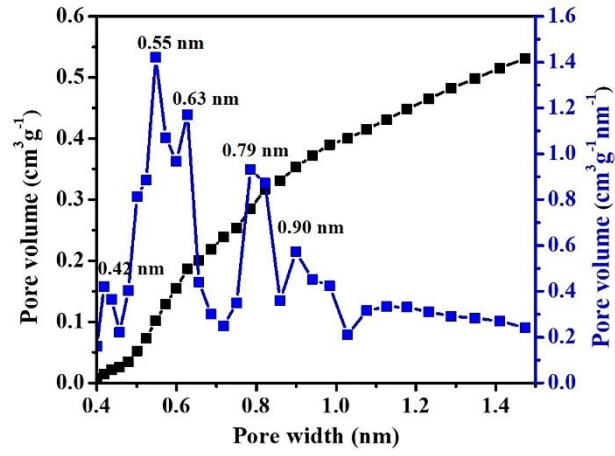

124

125

Figure S2. GCMC-PSD from CO<sub>2</sub> adsorption isotherm at 273 K.

126

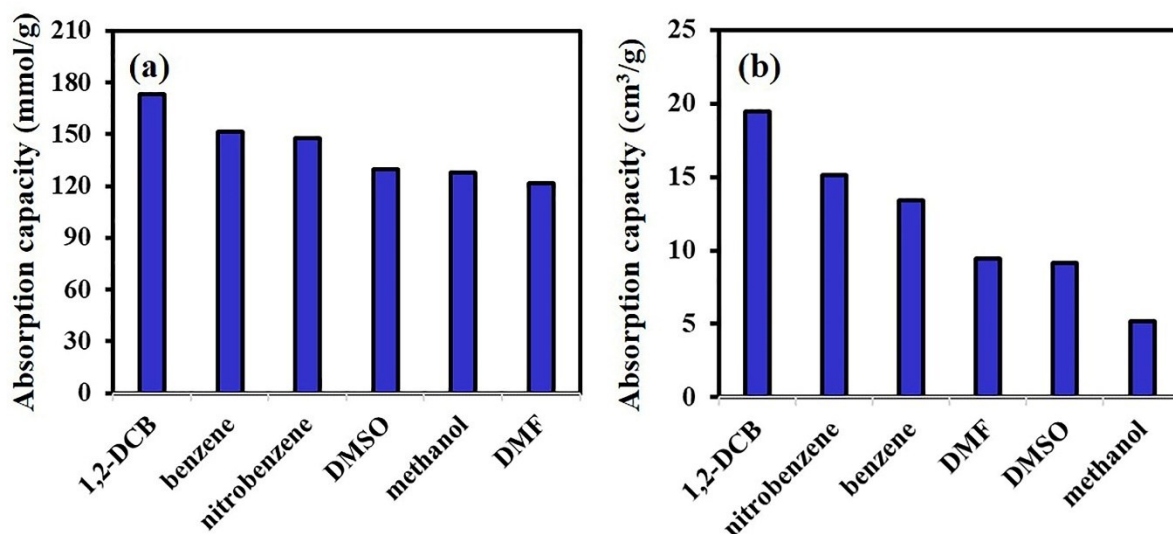

127

128 Figure S3. Absorption capacity of organic solvents by SHMP-1 in molar unit (mmol/g) and

129 volumetric

unit

(cm<sup>3</sup>/g).

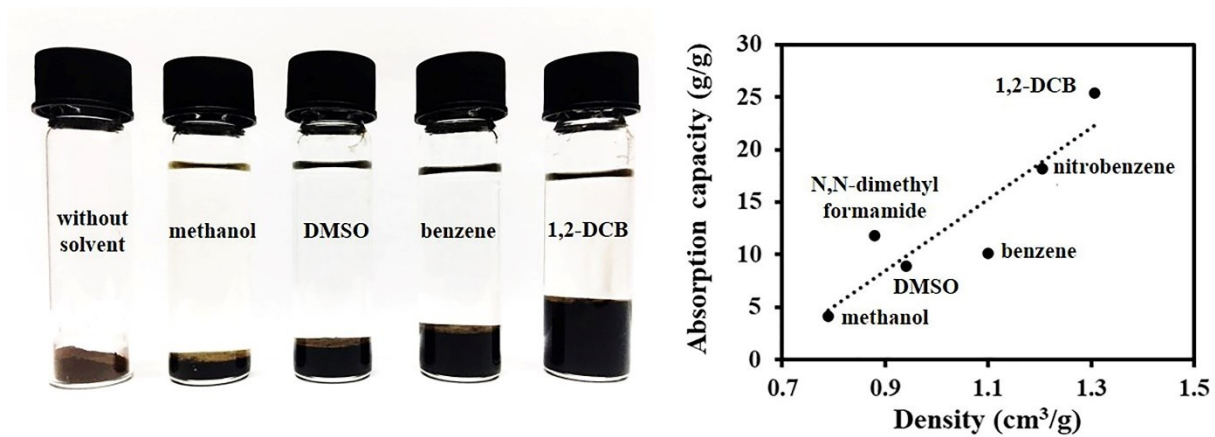

130

131 Figure S4. Photograph of 150 mg SHMP-1 without solvent or with 7 mL 1,2-dichlorobenzene  
 132 (1,2-DCB), benzene, dimethyl sulfoxide (DMSO) and methanol as well as the linear  
 133 relationship of uptake capacity of organic solvents by SHMP-1 with their density.

134

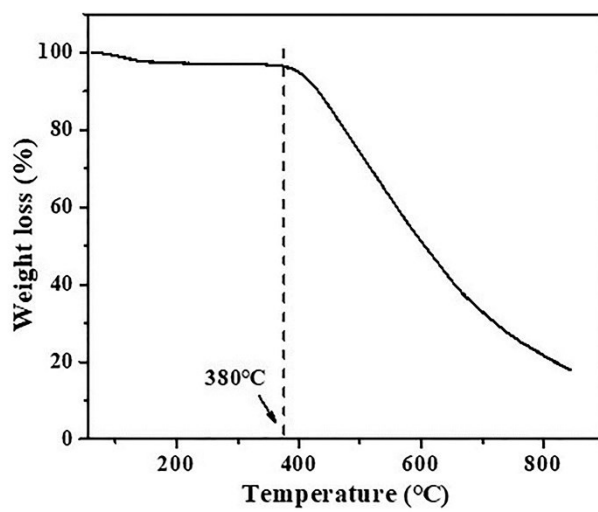

135

136

Figure S5. Thermogravimetric (TG) curve of SHMP-1.

137

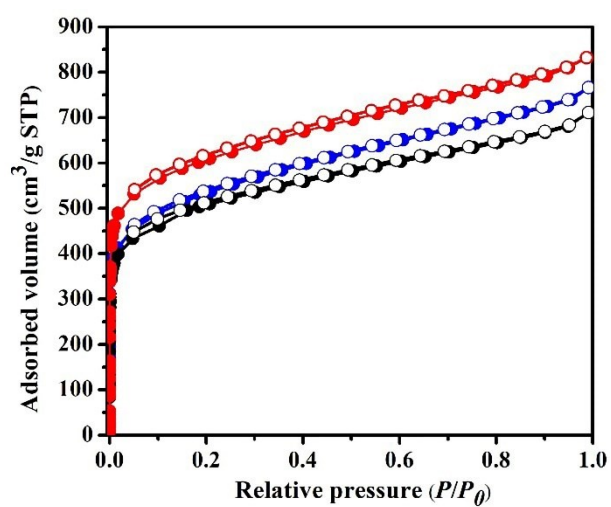

138

139 Figure S6. Nitrogen adsorption-desorption isotherm (77K) of SHMP-1 (red), 5 mol/L

140 HCl immersed SHMP-1 (blue) or 5 mol/L NaOH immersed SHMP-1 (black).

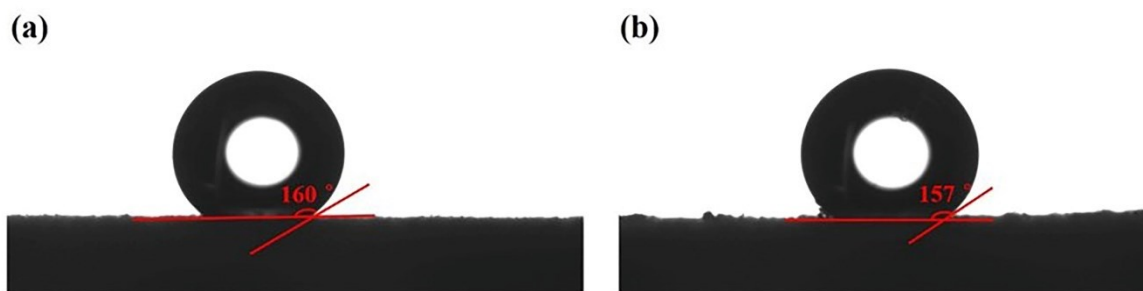

141

142 Figure S7. Water contact angle of SHMP-1 after immersed in 5 mol/L HCl (a) and 5 mol/L

143 NaOH (b) for 2 days.



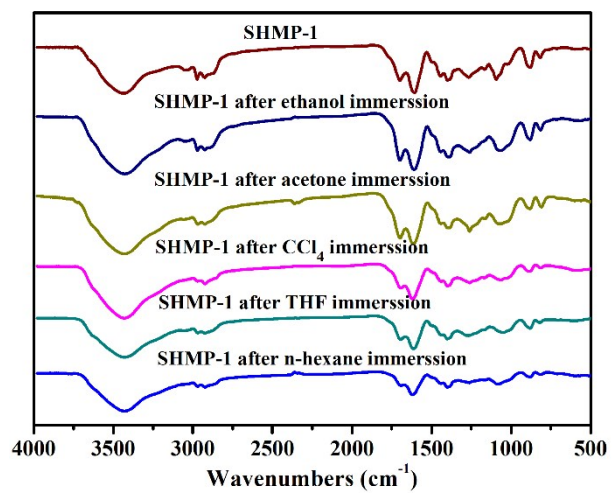

144

145

146

147

Figure S8. FTIR spectra of SHMP-1 after immersed in ethanol, acetone, carbon tetrachloride (CCl<sub>4</sub>), tetrahydrofuran (THF) and n-hexane for 2 days.

148

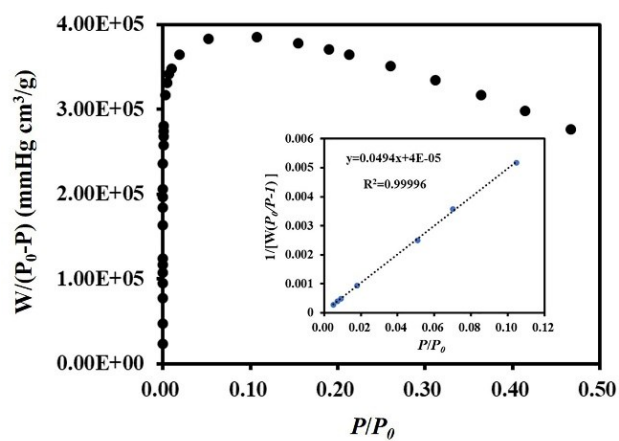

149

150 Figure S9. Rouquerol plot, i.e.,  $W/(P_0 - P)$  vs.  $P/P_0$ , of SHMP-1 from N<sub>2</sub> isotherm. Only  
151 the range below  $P/P_0 = 0.10$  satisfies the first consistency criterion for applying the BET  
152 theory. The inset plot is the linear region for the BET equation.

153

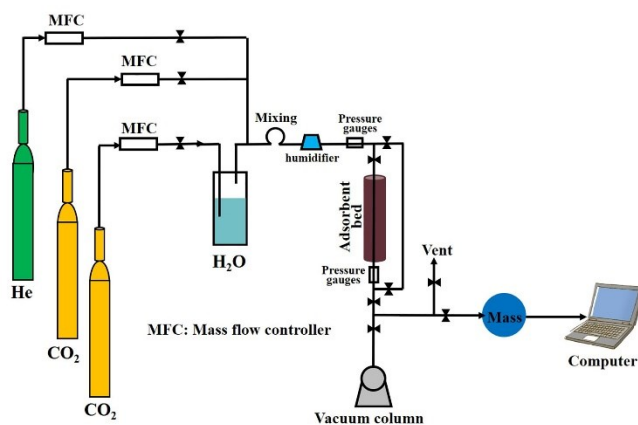

154

155 Figure S10. Schematic diagram of breakthrough experiment for CO<sub>2</sub>/H<sub>2</sub>O adsorption.

156

157

158

159

160
